# Supplementary material for: Cell-free expression, purification, and ligand-binding analysis of Drosophila melanogaster olfactory receptors DmOR67a, DmOR85b and DmORCO
Source: PubMed Central journal article supplement — Sci Rep. 2015 Jan 19;5:7867. doi: 10.1038/srep07867 (PMC4297953; doi:10.1038/srep07867), 2015-01-19
Supplement: srep07867-s1.pdf [file srep07867-s1.pdf]

# Supplementary Information

---

## **Cell-free expression, purification, and ligand-binding analysis of *Drosophila melanogaster* olfactory receptors DmOR67a, DmOR85b, and DmORCO**

Lotta Tollstoy Tegler\*<sup>†1,2</sup>, Karolina Corin<sup>†1,3</sup>, Julia Hillger<sup>1</sup>, Brooke Wassie<sup>1</sup>, Yanmei Yu<sup>1,4</sup>,  
Shuguang Zhang<sup>1</sup>

\*Corresponding author

†Equal contributors

1. Center for Bits and Atoms, Massachusetts Institute of Technology, 77  
Massachusetts, Cambridge, MA 02139-4307, USA
2. Division of Chemistry, Department of Physics, Chemistry and Biology, Linköping  
University, SE-581 83 Linköping, Sweden
3. Biomedical Engineering Research Group, School of Electrical and Information  
Engineering and Department of Molecular Medicine and Haematology, University  
of the Witwatersrand, Johannesburg, South Africa
4. College of Electronics and Information Engineering, Sichuan University, Chengdu,  
China 610065

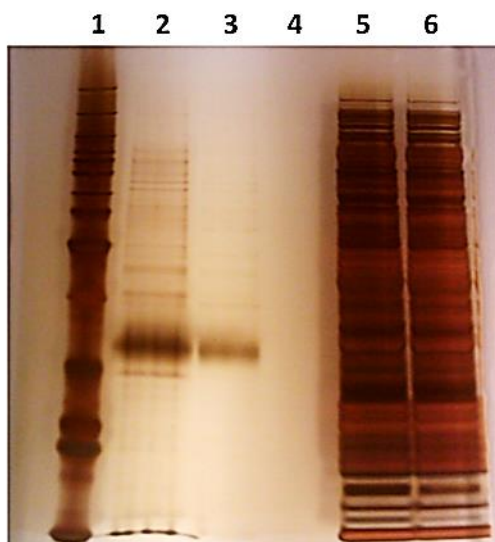

**Supplementary Figure 1:** Complete silver stain of DmOR85b purification (from Figure 3b). Lane 1: Ladder. Lane 2: Purified DmOR85b after concentration, loaded on gel at  $\sim 10X$  the concentration in lane 3 to visualize the impurities. Lane 3: purified DmOR85b; lane 4: wash 20; lane 5: flow through after capture on Rho ID4-beads; lane 6: cell-free reaction immediately after protein synthesis.

**Supplementary Table 1: Goodness-of-Fit Statistics for Ligand Binding Experiments**

| Sample            | $K_D(\mu\text{M})$ | MSE | Pseudo $R^2$ | AIC   |
|-------------------|--------------------|-----|--------------|-------|
| DmOR67a+DmORCO+EB | 0.5±0.2            | 2.4 | 0.79*        | 6.87* |
| DmOR67a+EB        | 1.2±2.1‡           | 5.9 | 0.29         | 7.77  |
| DmORCO+EB         | 4.8±3.6            | 1.1 | 0.74*        | 6.11* |
| DmOR67a+DmORCO+2H | 5.7±11.2‡          | 5.1 | 0.37         | 7.63  |
| DmOR85b+DmORCO+2H | 0.8±0.4            | 3.2 | 0.73*        | 7.18* |
| DmOR85b+2H        | 0.7±1.1‡           | 7.2 | 0.35         | 7.97  |
| DmORCO+2H         | 1.5±2.3‡           | 6.2 | 0.32         | 7.83  |
| DmOR85b+DmORCO+EB | +                  | +   | N/A          | N/A   |

+Data did not converge; curve could not be fit

\*Goodness-of-fit statistics are sufficient to indicate binding

‡The 95% confidence interval is very wide and includes physiologically impossible values, suggesting a poor fit, and either weak or no binding.

MSE – mean squared error; EB – ethyl benzoate; 2H – 2-heptanone

$K_D$ 's are expressed as ± 95% confidence interval in this table. In the text, they are expressed as ±S.E.
